# Supplementary material for: Power Loss Reduction of Angled Metallic Wedge Plasmonic Waveguides via the Interplay between Near-Field Optical Coupling and Modal Coupling
Source: MDPI journal article supplement (doi:10.3390/photonics9090663), 2022-09-16
Supplement: s1 [file s1]

Archive with 1 entries (1 files):
- photonics-1895847-supplementary.pdf
