# Supplementary material for: Power Loss Reduction of Angled Metallic Wedge Plasmonic Waveguides via the Interplay between Near-Field Optical Coupling and Modal Coupling
Source: MDPI journal article supplement (doi:10.3390/photonics9090663), 2022-09-16
Supplement: s1 [file s1 › photonics-1895847-supplementary.pdf]

## Supplementary Materials

Article

# Power Loss Reduction of Angled Metallic Wedge Plasmonic Waveguides via the Interplay between Near-Field Optical Coupling and Modal Coupling

Yin-Song Liao <sup>1</sup>, Jia-Ren Wu <sup>2</sup>, Diksha Thakur <sup>2</sup>, Jy-Shan Hsu <sup>2</sup>, Ram Prakash Dwivedi <sup>3</sup>  
and Sheng Hsiung Chang <sup>2,\*</sup>

<sup>1</sup> National Tsing Hua University, Hsinchu 300044, Taiwan

<sup>2</sup> Department of Physics, Chung Yuan Christian University, Taoyuan 320314, Taiwan

<sup>3</sup> School of Electrical and Computer Science Engineering, Shoolini University, Solan, India

\* Correspondence: shchang@cycu.edu.tw

### Calculations of Propagation Loss and Modal Index

Figure S1a presents the  $E_x$ -Z plot. The power loss can be obtained by fitting the Y-dependent oscillation peaks with an exponential decaying function:  $E_x(Z) = E_o^P \exp(-\alpha Z / 2)$ , where  $E_o^P$  is the peak value of the  $E_x$  field at the starting point of the fitting curve and  $\alpha$  is the propagation loss. Figure S1b presents the modal wavelength spectrum, which can be obtained by analyzing the black curve in Figure S1a with a fast Fourier transformation method. The modal index can be obtained by using the simple equation:  $\lambda_0/\lambda_m$ , where  $\lambda_0$  and  $\lambda_m$  are the excitation wavelength in free space and the modal wavelength, respectively.

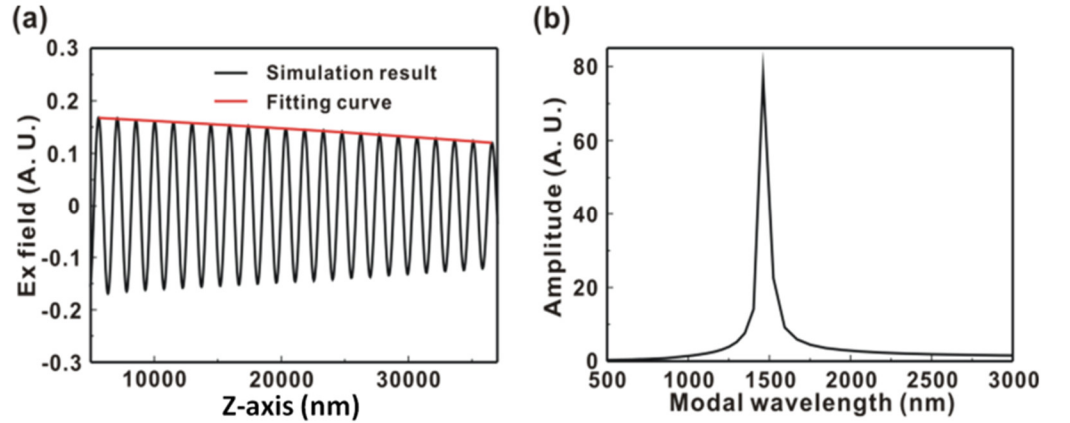

**Figure. S1.** (a)  $E_x$ -Z plot and the fitting curve, (b) Modal wavelength spectrum.
